# Supplementary material for: In vitro osteogenic and in ovo angiogenic effects of a family of natural origin P 2 O 5 -free bioactive glasses
Source: Royal Society of Chemistry journal article supplement (doi:10.1039/d4ra04731a), 2024-01-01
Supplement: d4ra04731a1.pdf [file d4ra04731a1.pdf]

## Supplementary Information

### *In vitro* osteogenic and *in ovo* angiogenic effects of a family of natural origin P<sub>2</sub>O<sub>5</sub>-free bioactive glasses

Martyna Nikody,<sup>a,b</sup> Lilian Kessels<sup>c</sup>, Lizette Morejón<sup>d</sup>, Matthias Schumacher<sup>b</sup>, Tim G.A.M. Wolfs<sup>c</sup>, Timo Rademakers<sup>a,b,e</sup>, José A. Delgado<sup>d,f</sup>, Pamela Habibovic<sup>b</sup>, Lorenzo Moroni<sup>a</sup>, Elizabeth R. Balmayor<sup>\*c,g</sup>

\* Corresponding author

<sup>a</sup> Complex Tissue Regeneration, MERLN Institute for Technology-Inspired Regenerative Medicine, Maastricht University, 6229 ER Maastricht, the Netherlands.

<sup>b</sup> Department of Instructive Biomaterials Engineering, MERLN Institute for Technology-Inspired Regenerative Medicine, Maastricht University, Maastricht, the Netherlands.

<sup>c</sup> Department of Paediatrics, Research Institute for Oncology and Reproduction (GROW), Maastricht University, Maastricht, the Netherlands

<sup>d</sup> Center of Biomaterials, University of Havana, 10400 Havana, Cuba

<sup>e</sup> Cell Biology-Inspired Tissue Engineering, MERLN Institute for Technology-Inspired Regenerative Medicine, Maastricht University, 6229 ER Maastricht, the Netherlands

<sup>f</sup> Universitat Internacional de Catalunya, 08195 Barcelona, Spain

<sup>g</sup> Experimental Orthopaedics and Trauma Surgery, Department of Orthopaedic, Trauma, and Reconstructive Surgery, RWTH Aachen University Hospital, 52074 Aachen, Germany

#### Day 1

| Tukey's multiple comparisons test<br>BG-GS | Adjusted P Value | Summary |
|--------------------------------------------|------------------|---------|
| 100 vs. 200                                | 0.0047           | **      |
| 100 vs. 300                                | 0.0022           | **      |
| 100 vs. 400                                | 0.0002           | ***     |
| 100 vs. 1000                               | 0.7320           | ns      |
| 200 vs. 300                                | 0.7320           | ns      |
| 200 vs. 400                                | <0.0001          | ****    |
| 200 vs. 1000                               | 0.0112           | *       |
| 300 vs. 400                                | <0.0001          | ****    |
| 300 vs. 1000                               | 0.0047           | **      |
| 400 vs. 1000                               | 0.0001           | ***     |

| Tukey's multiple comparisons test<br>BG-WS | Adjusted P Value | Summary |
|--------------------------------------------|------------------|---------|
| 100 vs. 200                                | <0.0001          | ****    |
| 100 vs. 300                                | <0.0001          | ****    |
| 100 vs. 400                                | 0.4502           | ns      |
| 100 vs. 1000                               | 0.0006           | ***     |
| 200 vs. 300                                | <0.0001          | ****    |
| 200 vs. 400                                | <0.0001          | ****    |
| 200 vs. 1000                               | <0.0001          | ****    |
| 300 vs. 400                                | <0.0001          | ****    |
| 300 vs. 1000                               | 0.0023           | **      |
| 400 vs. 1000                               | 0.0014           | **      |

| Tukey's multiple comparisons test<br>BG-YS | Adjusted P Value | Summary |
|--------------------------------------------|------------------|---------|
| 100 vs. 200                                | <0.0001          | ****    |
| 100 vs. 300                                | 0.1371           | ns      |
| 100 vs. 400                                | 0.0001           | ***     |

|              |         |           |
|--------------|---------|-----------|
| 100 vs. 1000 | 0.0001  | ***       |
| 200 vs. 300  | <0.0001 | ****      |
| 200 vs. 400  | 0.0252  | *         |
| 200 vs. 1000 | 0.0427  | *         |
| 300 vs. 400  | 0.0004  | ***       |
| 300 vs. 1000 | 0.0003  | ***       |
| 400 vs. 1000 | 0.9695  | <b>ns</b> |

### Day 7

| Tukey's multiple comparisons test<br><b>BG-GS</b> | Adjusted P Value | Summary   |
|---------------------------------------------------|------------------|-----------|
| 100 vs. 200                                       | >0.9999          | <b>ns</b> |
| 100 vs. 300                                       | 0.0266           | *         |
| 100 vs. 400                                       | 0.0356           | *         |
| 100 vs. 1000                                      | 0.0070           | **        |
| 200 vs. 300                                       | 0.0248           | *         |
| 200 vs. 400                                       | 0.0383           | *         |
| 200 vs. 1000                                      | 0.0066           | **        |
| 300 vs. 400                                       | 0.0015           | **        |
| 300 vs. 1000                                      | 0.4891           | <b>ns</b> |
| 400 vs. 1000                                      | 0.0006           | ***       |

| Tukey's multiple comparisons test<br><b>BG-WS</b> | Adjusted P Value | Summary   |
|---------------------------------------------------|------------------|-----------|
| 100 vs. 200                                       | 0.0038           | **        |
| 100 vs. 300                                       | 0.0183           | *         |
| 100 vs. 400                                       | 0.0003           | ***       |
| 100 vs. 1000                                      | <0.0001          | ****      |
| 200 vs. 300                                       | 0.3056           | <b>ns</b> |
| 200 vs. 400                                       | 0.0150           | *         |
| 200 vs. 1000                                      | 0.0018           | **        |
| 300 vs. 400                                       | 0.0033           | **        |
| 300 vs. 1000                                      | 0.0006           | ***       |
| 400 vs. 1000                                      | 0.0975           | <b>ns</b> |

| Tukey's multiple comparisons test<br><b>BG-YS</b> | Adjusted P Value | Summary   |
|---------------------------------------------------|------------------|-----------|
| 100 vs. 200                                       | <0.0001          | ****      |
| 100 vs. 300                                       | 0.6685           | <b>ns</b> |
| 100 vs. 400                                       | <0.0001          | ****      |
| 100 vs. 1000                                      | <0.0001          | ****      |
| 200 vs. 300                                       | <0.0001          | ****      |
| 200 vs. 400                                       | 0.0143           | *         |
| 200 vs. 1000                                      | <0.0001          | ****      |
| 300 vs. 400                                       | <0.0001          | ****      |
| 300 vs. 1000                                      | <0.0001          | ****      |
| 400 vs. 1000                                      | <0.0001          | ****      |

### Day 14

| Tukey's multiple comparisons test | Adjusted P Value | Summary |
|-----------------------------------|------------------|---------|
|-----------------------------------|------------------|---------|

| <b>BG-GS</b> |         |           |
|--------------|---------|-----------|
| 100 vs. 200  | 0.7293  | <b>ns</b> |
| 100 vs. 300  | <0.0001 | ****      |
| 100 vs. 400  | 0.0001  | ***       |
| 100 vs. 1000 | <0.0001 | ****      |
| 200 vs. 300  | <0.0001 | ****      |
| 200 vs. 400  | <0.0001 | ****      |
| 200 vs. 1000 | <0.0001 | ****      |
| 300 vs. 400  | 0.0004  | ***       |
| 300 vs. 1000 | 0.0317  | *         |
| 400 vs. 1000 | 0.0043  | **        |

| Tukey's multiple comparisons test<br><b>BG-WS</b> | Adjusted P Value | Summary |
|---------------------------------------------------|------------------|---------|
| 100 vs. 200                                       | 0.0001           | ***     |
| 100 vs. 300                                       | <0.0001          | ****    |
| 100 vs. 400                                       | 0.0007           | ***     |
| 100 vs. 1000                                      | <0.0001          | ****    |
| 200 vs. 300                                       | <0.0001          | ****    |
| 200 vs. 400                                       | 0.0243           | *       |
| 200 vs. 1000                                      | <0.0001          | ****    |
| 300 vs. 400                                       | <0.0001          | ****    |
| 300 vs. 1000                                      | <0.0001          | ****    |
| 400 vs. 1000                                      | <0.0001          | ****    |

| Tukey's multiple comparisons test<br><b>BG-YS</b> | Adjusted P Value | Summary   |
|---------------------------------------------------|------------------|-----------|
| 100 vs. 200                                       | <0.0001          | ****      |
| 100 vs. 300                                       | <0.0001          | ****      |
| 100 vs. 400                                       | <0.0001          | ****      |
| 100 vs. 1000                                      | <0.0001          | ****      |
| 200 vs. 300                                       | 0.0006           | ***       |
| 200 vs. 400                                       | <0.0001          | ****      |
| 200 vs. 1000                                      | <0.0001          | ****      |
| 300 vs. 400                                       | <0.0001          | ****      |
| 300 vs. 1000                                      | <0.0001          | ****      |
| 400 vs. 1000                                      | 0.2129           | <b>ns</b> |

**Figure S1.** Detailed statistical comparison of the influence of different concentrations of BG-GS, BG-WS, and BG-YS on days 1, 7, and 14 on the DNA content of hMSCs.

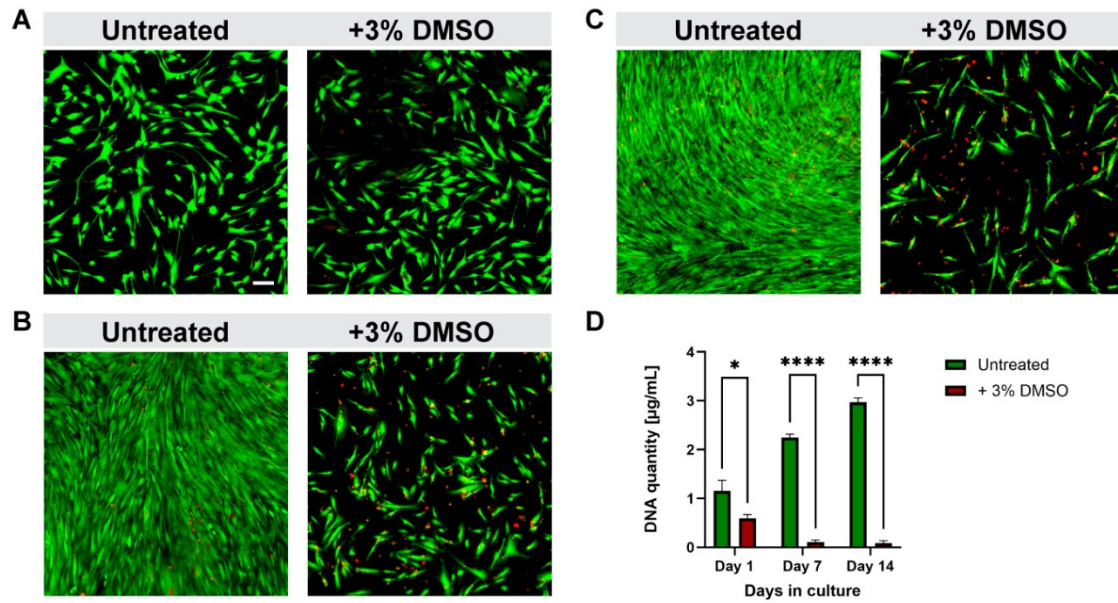

**Figure S2.** Live/Dead staining showing viability as well as morphology of hMSCs cultured with basic culture medium (untreated) and with basic culture medium containing 3% DMSO for A) 1 day, B) 7 days, and C) 14 days. Scale bar is equal to 100  $\mu\text{m}$ . Calcein AM stained the viable cells green while EthD-1 labelled the non-viable cells red. D) DNA content on day 1, 7, and 14 of cell culture in the above-mentioned conditions.
